# Supplementary material for: Herpes simplex virus 1 and 2 educational assessment of young adults in rural southwest Virginia
Source: PLOS journal article supplement (doi:10.1371/journal.pone.0179969), 2017-06-27
Supplement: S2 (10.1371/journal.pone.0179969.s002) [file journal.pone.0179969.s002]

Interview Data: 28 total participants

|    |                                                                                                  |    |     |
|----|--------------------------------------------------------------------------------------------------|----|-----|
| Q1 | Question 1) Do you know what disease HSV1 and HSV2 cause?                                        |    |     |
|    | Yes                                                                                              | 9  | 32% |
|    | No                                                                                               | 10 | 35% |
|    | Answered Partially correct                                                                       | 2  | 7%  |
|    | Unsure in difference between HSV1 and HSV2                                                       | 7  | 25% |
| Q2 | Question 2) How do you catch it?                                                                 |    |     |
|    | Answered correctly                                                                               | 12 | 43% |
|    | Answered incorrectly                                                                             | 1  | 3%  |
|    | Unsure                                                                                           | 3  | 11% |
|    | Partially correct (only mentioned sex)                                                           | 12 | 43% |
| Q3 | Question 3) How do you get rid of HSV?                                                           |    |     |
|    | Answered correctly                                                                               | 21 | 75% |
|    | Answered incorrectly                                                                             | 4  | 14% |
|    | Unsure                                                                                           | 3  | 11% |
| Q4 | Question 4) Did you learn about HSV in your high school health ed class? And what did you learn? |    |     |
|    | Yes, comprehensive                                                                               | 4  |     |
|    | Yes, partial                                                                                     | 16 |     |
|    | No                                                                                               | 3  |     |
|    | Unsure                                                                                           | 5  |     |
| Q5 | Question 5) Did you learn about other STIs, and which ones?                                      |    |     |
|    | Yes, Comprehensive (more than 4)                                                                 | 10 |     |
|    | Yes, partial (3 or less)                                                                         | 13 |     |
|    | No                                                                                               | 1  |     |
|    | Unsure or Doesn't remember                                                                       | 4  |     |
| Q6 | Question 7) Do you wish you had learned more about HSV and Stis in sex ed in high school?        |    |     |
|    | Yes                                                                                              | 22 |     |
|    | No                                                                                               | 6  |     |
| Q7 | Question 8) Was HSV discussed with peers?                                                        |    |     |
|    | Yes                                                                                              | 8  |     |
|    | Yes, jokingly                                                                                    | 7  |     |
|    | No                                                                                               | 13 |     |
| Q8 | Question 9) Where have you learned about HSV and other STIs?                                     |    |     |
|    | Peers                                                                                            | 6  |     |
|    | Internet (WebMD, VDH)                                                                            | 17 |     |
|    | Nurse/doctor                                                                                     | 2  |     |

|                         |   |
|-------------------------|---|
| Sex ed class            | 3 |
| TV                      | 3 |
| College classes         | 9 |
| Schiffert health center | 2 |
| Parents                 | 2 |
| Books                   | 1 |

Q9      Question 10) Best way to teach about STIs and sexual health in high school

|                                                  |    |
|--------------------------------------------------|----|
| Role playing or game                             | 3  |
| handouts                                         | 2  |
| younger instructor (college or grad students)    | 11 |
| Split up girls and boys                          | 3  |
| Sex ed class taught later in high school         | 5  |
| More realistic (real life stories)               | 7  |
| encourage parents to talk about it               | 1  |
| Different workshops, sessions and guest speakers | 5  |
| Hard facts                                       | 2  |
| Show pictures                                    | 4  |
| Modern videos                                    | 2  |
| Computer modules/internet                        | 3  |
| less shame attached it subjects                  | 1  |
| not abstinence based                             | 3  |

Q10      Question 12) Who would you go to for support and to learn more about it?

|               |    |
|---------------|----|
| Doctor        | 15 |
| Friends       | 11 |
| Family Member | 11 |
| Internet      | 9  |
| Partner       | 3  |
| Unsure        | 2  |

Q11      Question 13) Do you have HSV1 or HSV2?

|        |    |
|--------|----|
| HSV1   | 5  |
| HSV2   | 0  |
| No     | 21 |
| Unsure | 4  |
